# Supplementary material for: Calculating Protein Content of Expressed Breast Milk to Optimize Protein Supplementation in Very Low Birth Weight Infants with Minimal Effort—A Secondary Analysis
Source: MDPI journal article supplement (doi:10.3390/nu12051231), 2020-04-27
Supplement: s1 [file s1]

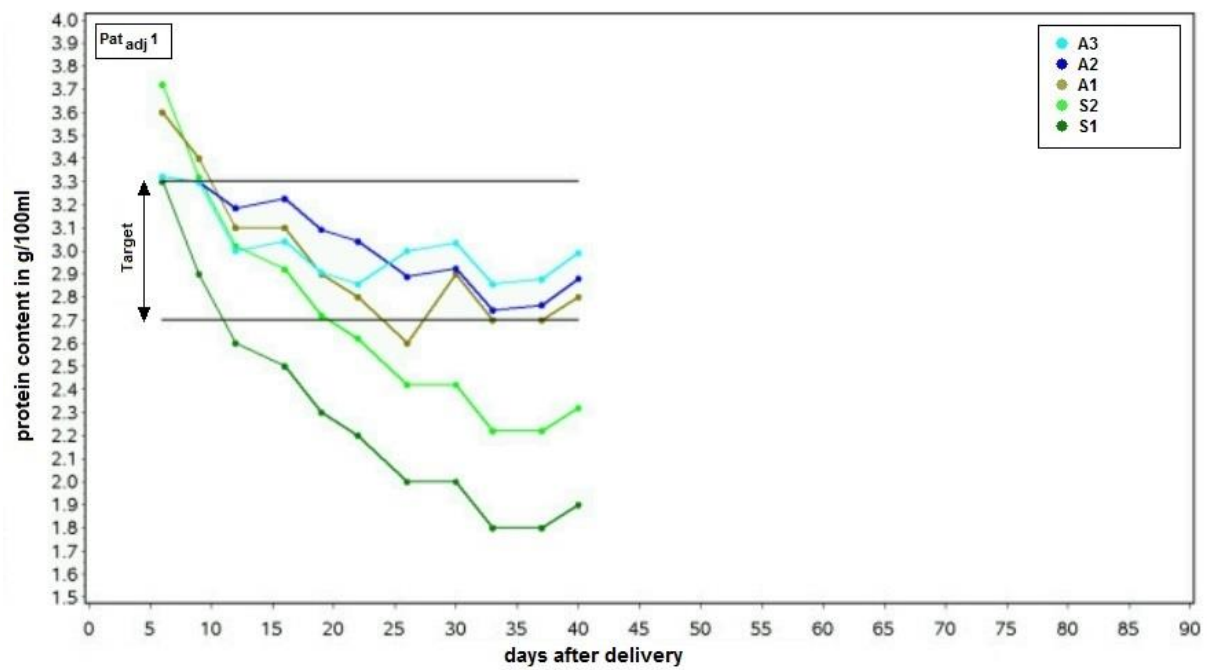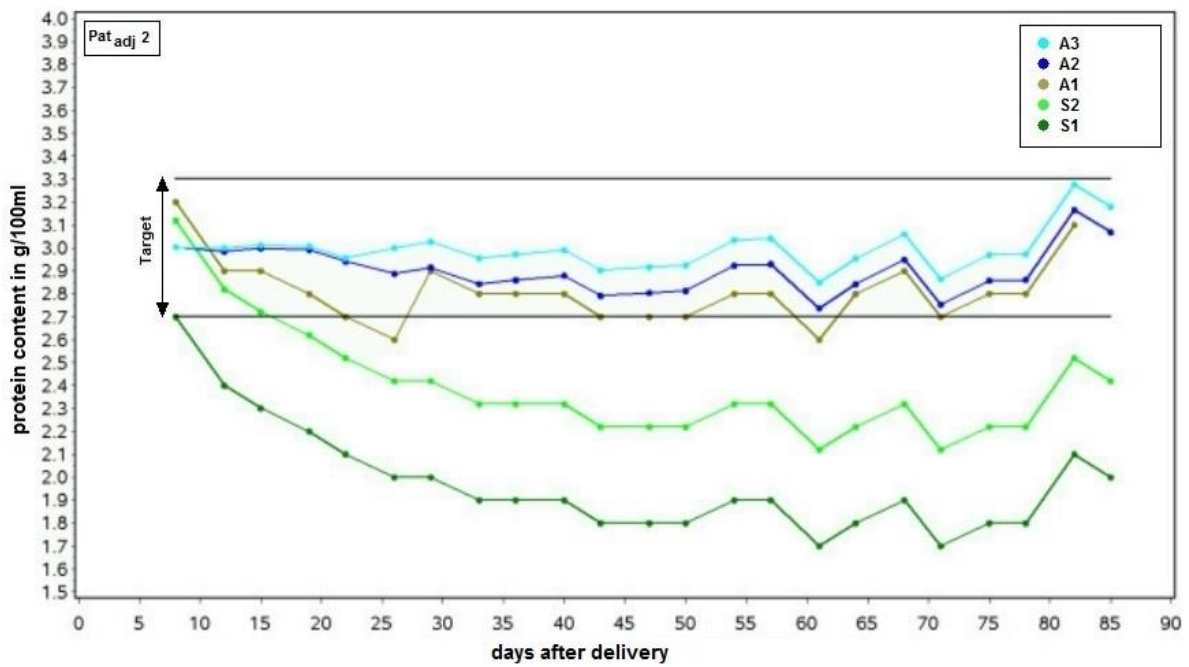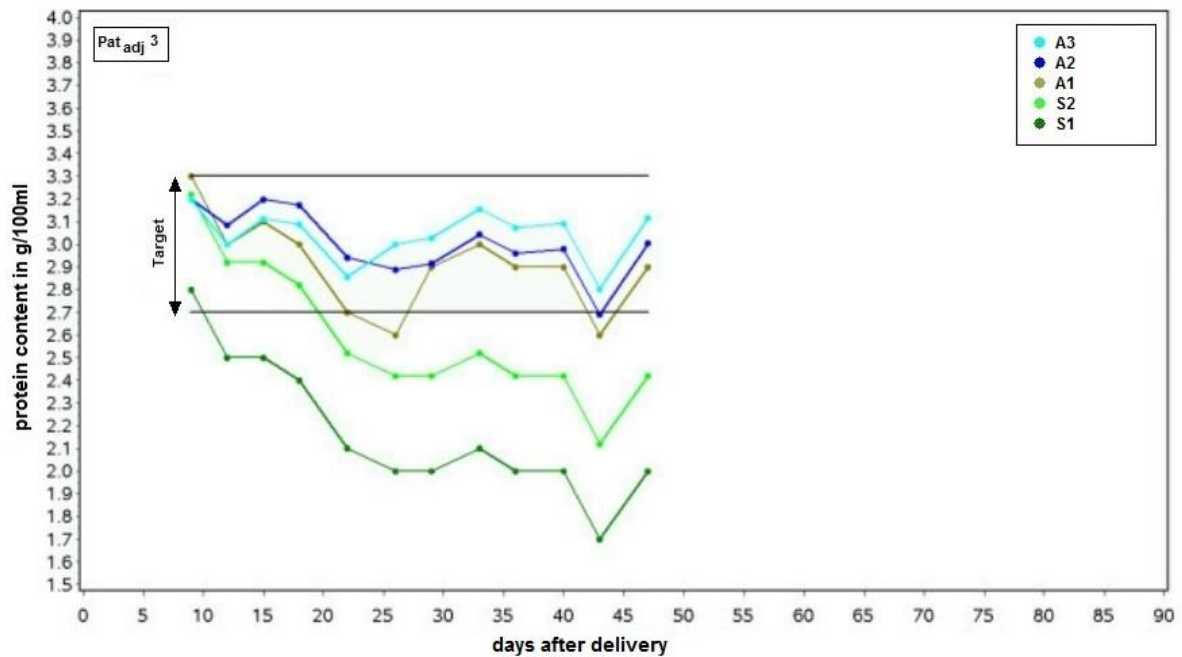

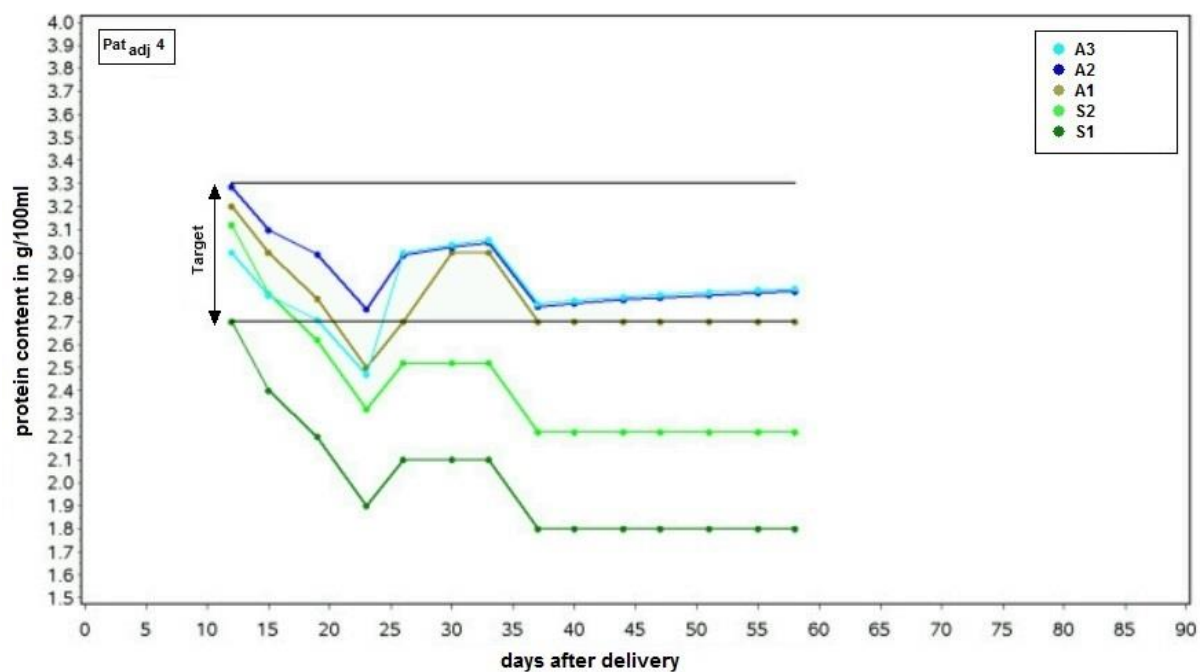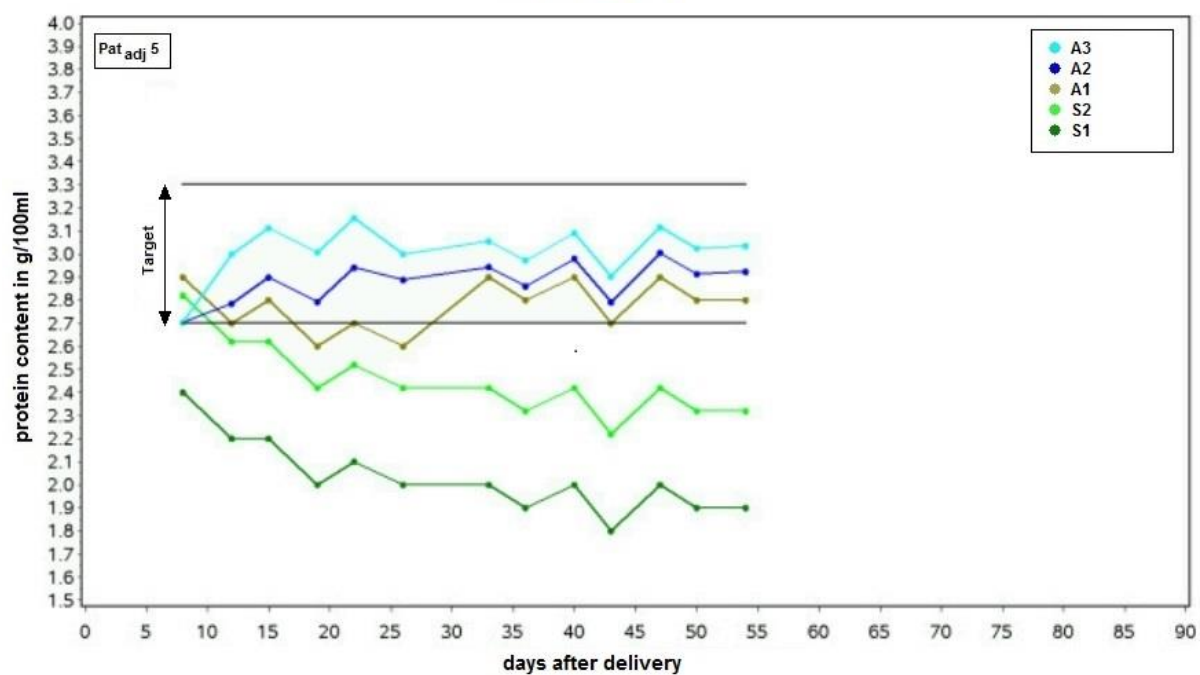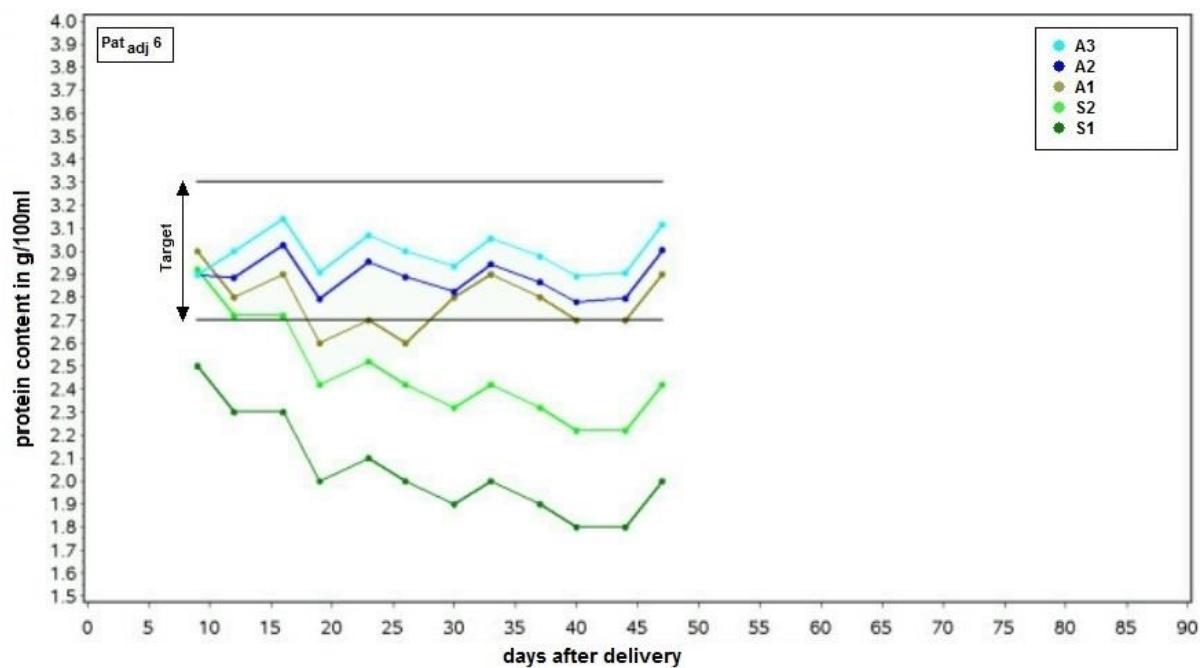

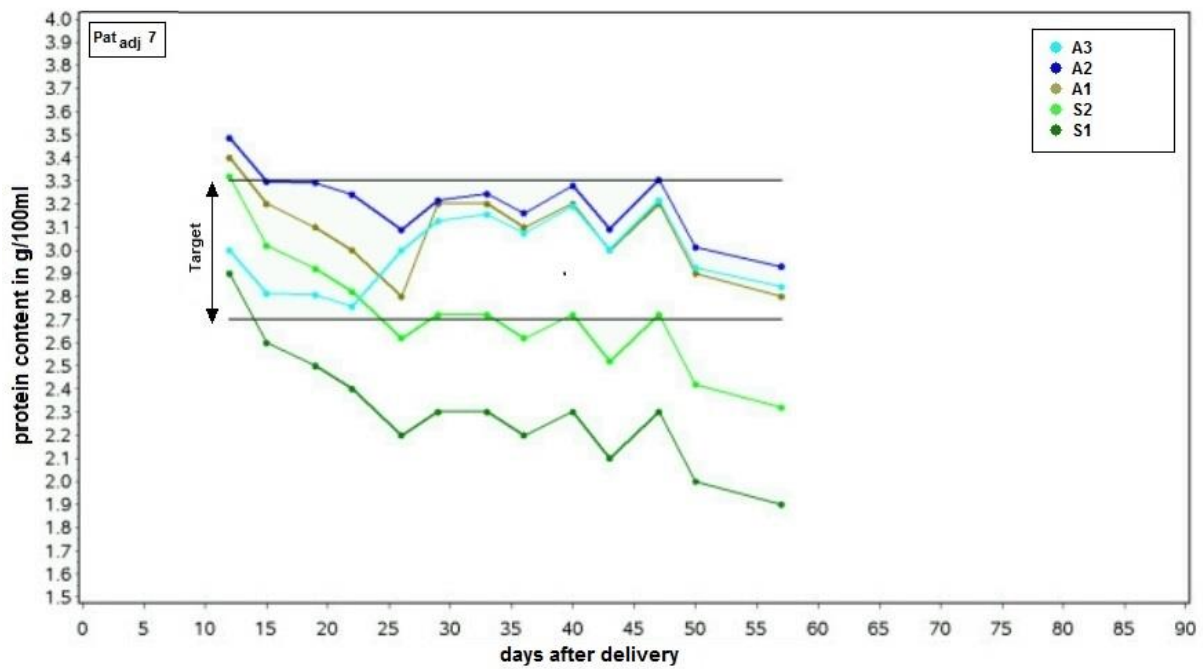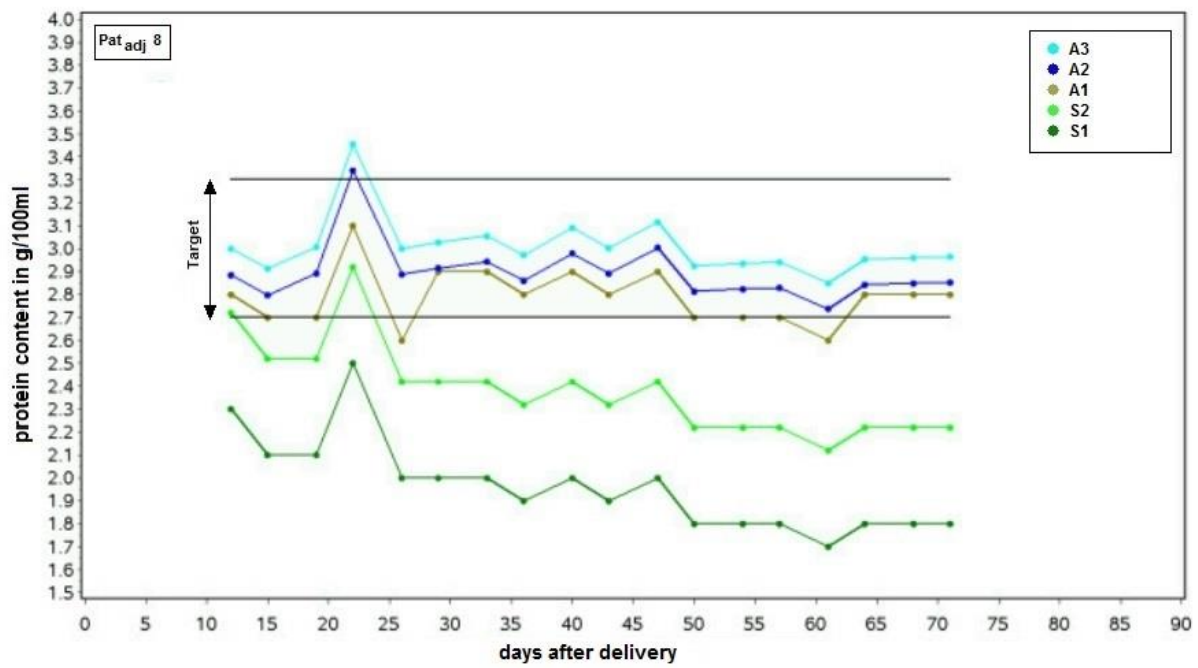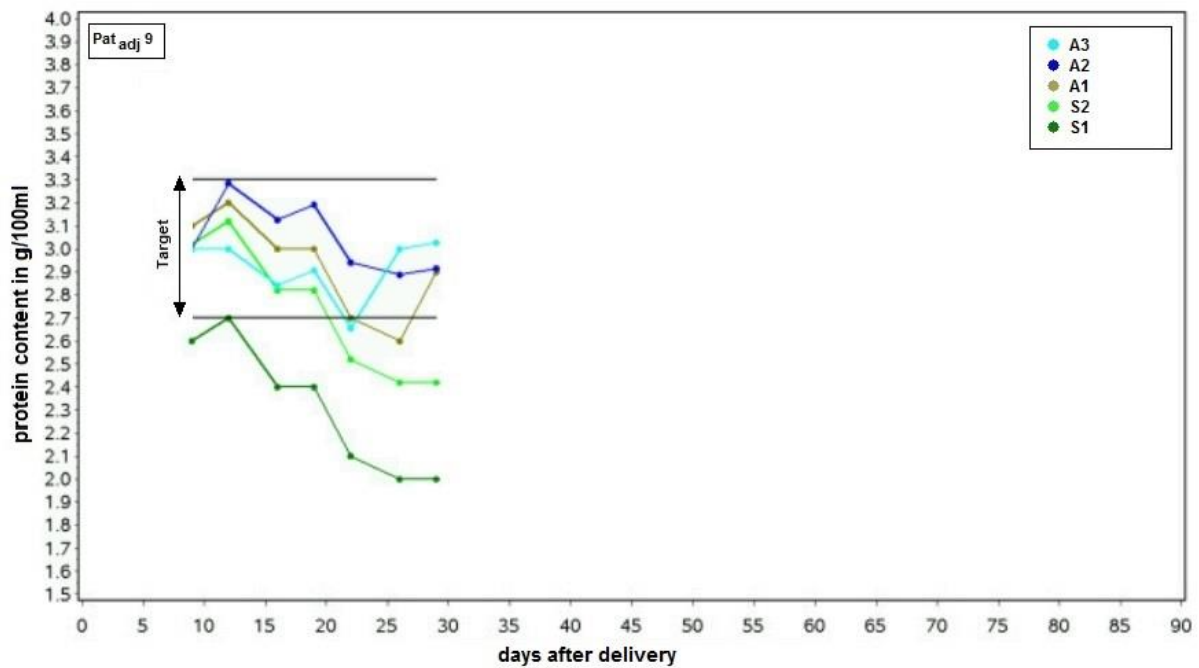

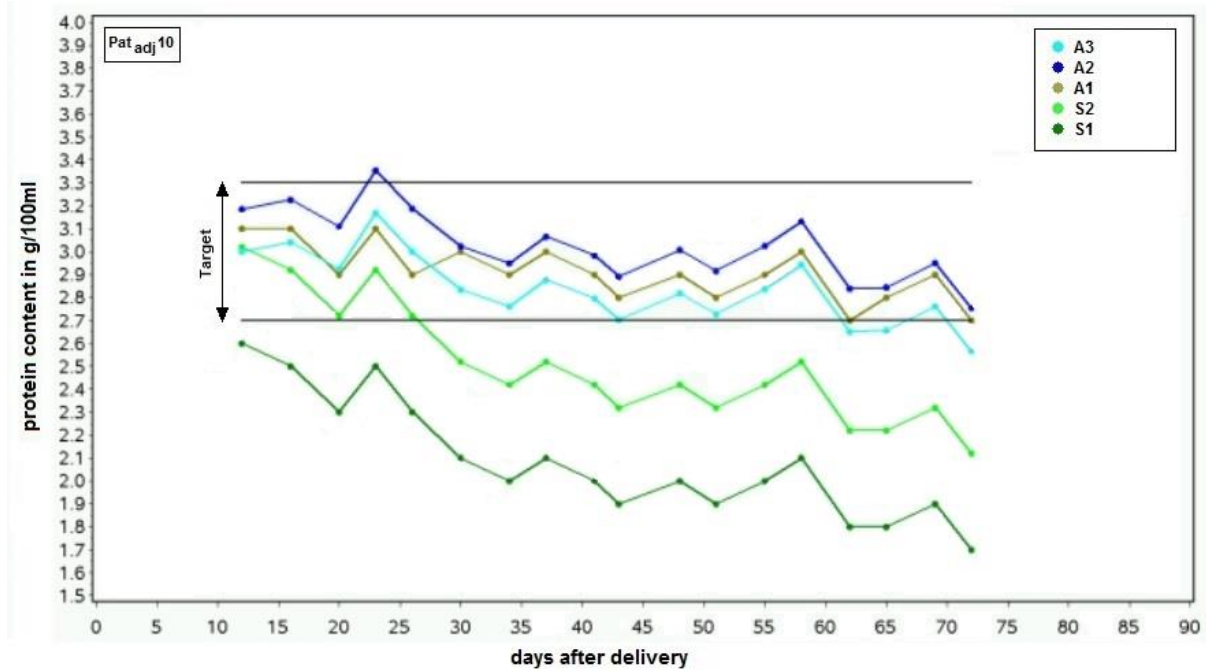

Figure S2: Comparing the resulting protein supply performing the 5 different supplementations strategies (S1: standardized supplementation adding 1g protein/100ml breast milk; S2: standardized supplementation adding 1.42g protein/100ml breast milk; A1: adding protein according to protein content of preterm breast milk after Fenton et al. [13]; A2: adding protein according to calculated breast milks' protein content by using the 'breast milk-equation (BME)'; A3: adding protein according to calculated breast milks' protein content by using the 'breast milk-equation and adjusting twice on day 12 and 26 by measured actual protein content) in the validation cohort (10 patients; Pat<sub>adj</sub>1-10)
