# Supplementary material for: Calculating Protein Content of Expressed Breast Milk to Optimize Protein Supplementation in Very Low Birth Weight Infants with Minimal Effort—A Secondary Analysis
Source: MDPI journal article supplement (doi:10.3390/nu12051231), 2020-04-27
Supplement: s1 [file s1]

Pat adj 1

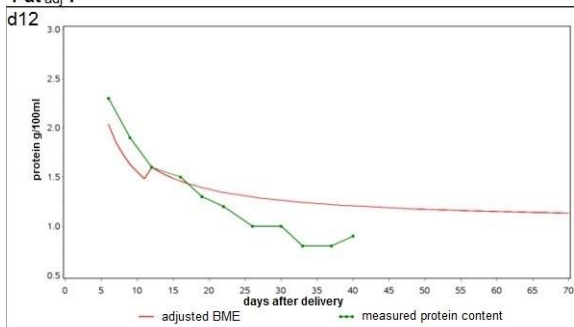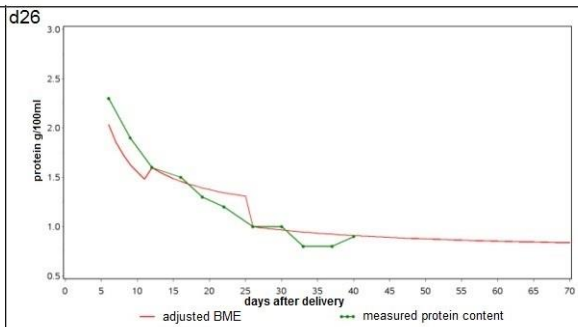

Pat adj 2

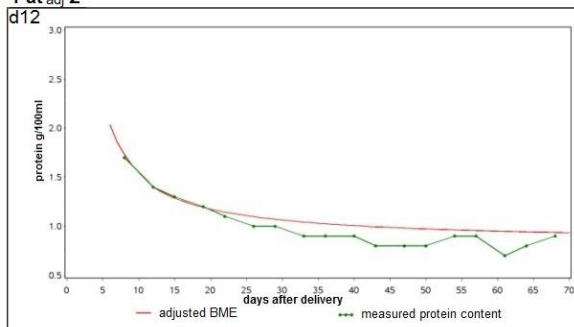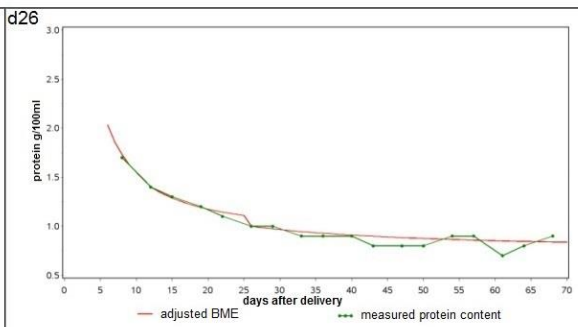

Pat adj 3

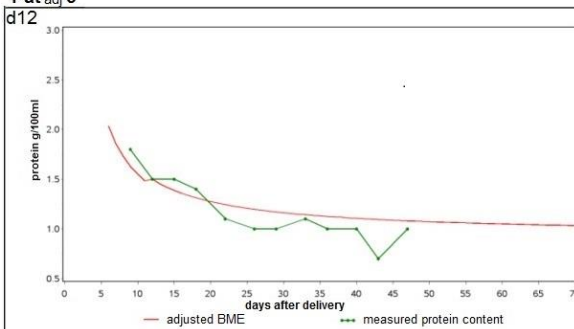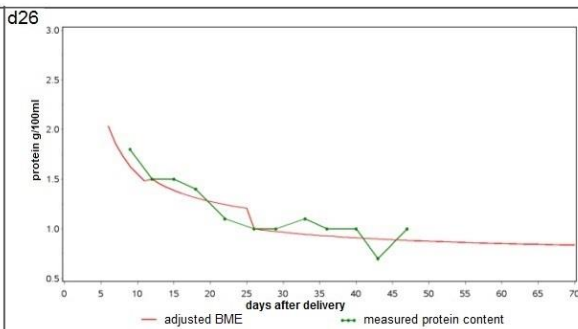

Pat adj 4

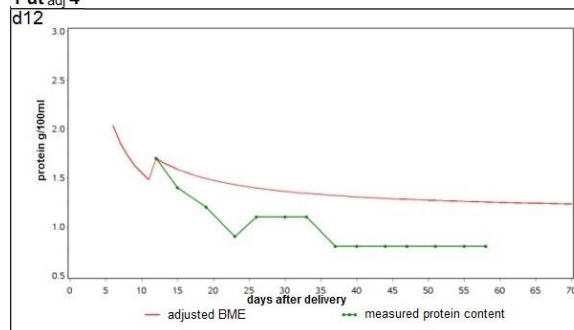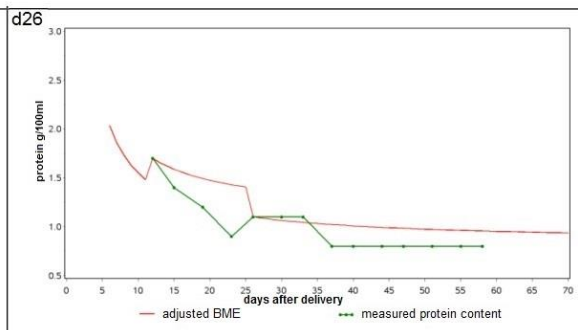

Pat adj 5

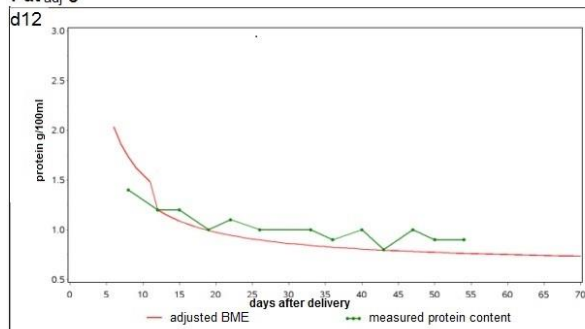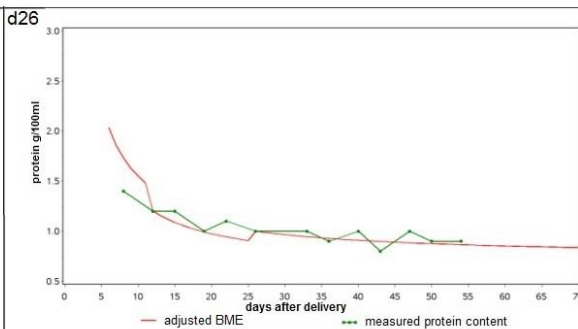

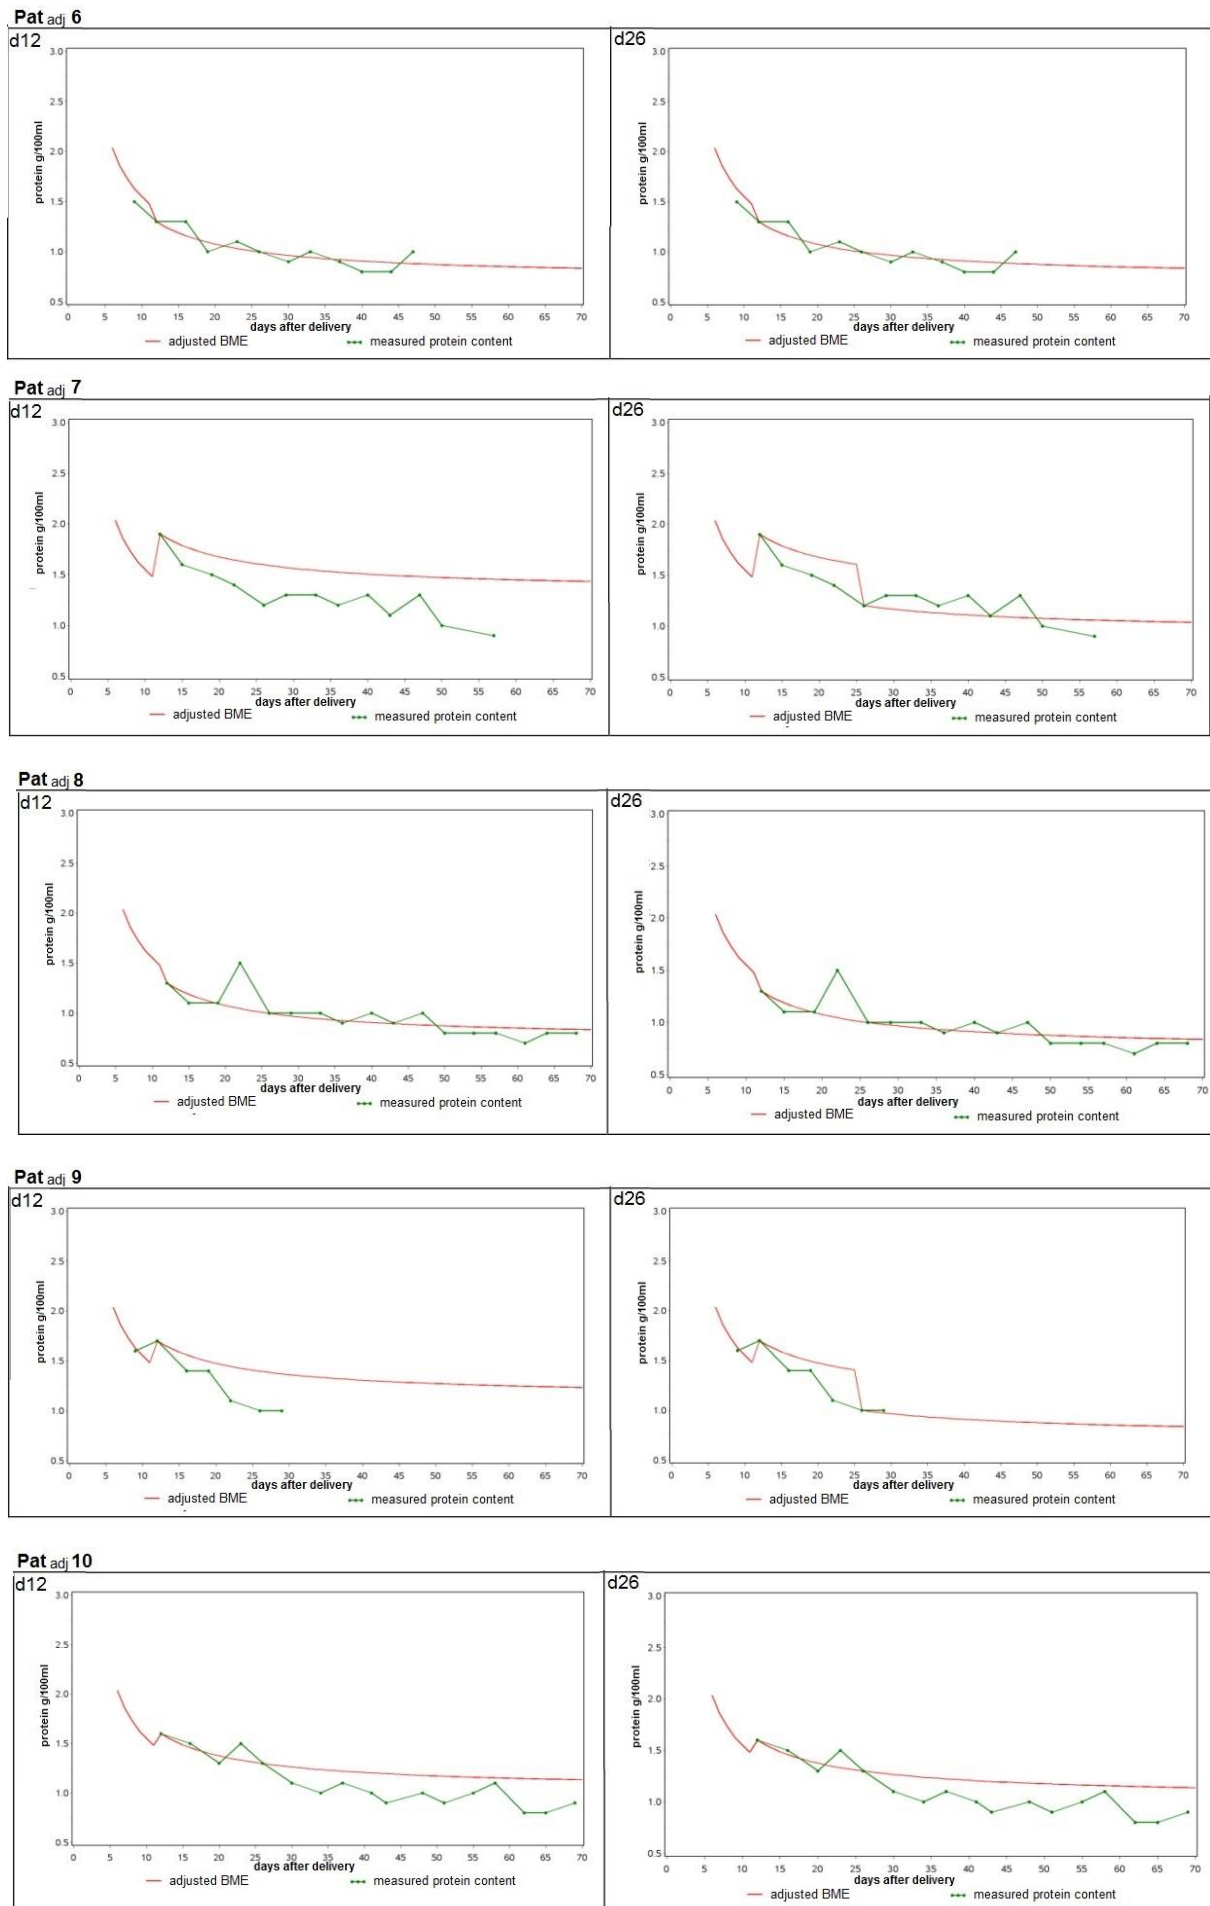

Figure S1: Adjustment of the 'breast milk-equation (BME)' of the validation cohort (10 patients; Pat<sub>adj</sub>1-10) on day 12 and 26 after delivery by measured actual protein content
